# Supplementary material for: Does Z′ equal 1 or 2? Enhanced powder NMR crystallography verification of a disordered room temperature crystal structure of a p38 inhibitor for chronic obstructive pulmonary disease
Source: Royal Society of Chemistry journal article supplement (doi:10.1039/c7cp02349a), 2017-01-01
Supplement: c7cp02349a1.pdf [file c7cp02349a1.pdf]

Electronic Supporting Information for:

**Does  $Z'$  Equal 1 or 2? Enhanced Powder NMR  
Crystallography Verification of a Disordered Room  
Temperature Crystal Structure of a p38 Inhibitor  
for Chronic Obstructive Pulmonary Disease**

Cory M. Widdifield<sup>a†</sup>, Sten O. Nilsson Lill<sup>b</sup>, Anders Broo<sup>b</sup>, Maria Lindkvist<sup>b</sup>, Anna Pettersen<sup>b</sup>, Anna Svensk Ankarberg<sup>b</sup>, Peter Aldred<sup>b</sup>, Staffan Schantz<sup>\*b</sup> and Lyndon Emsley<sup>\*c</sup>

<sup>a</sup> Institut des Sciences Analytiques (CNRS/ENS de Lyon/UCB Lyon 1), Centre de RMN à Très Hauts Champs, Université de Lyon, 69100 Villeurbanne, France

<sup>b</sup> AstraZeneca Gothenburg, R&D, Pharmaceutical Technology & Development, SE-431 83 Mölndal, Sweden

<sup>c</sup> Institut des Sciences et Ingénierie Chimiques, Ecole Polytechnique Fédérale de Lausanne (EPFL), CH-1015 Lausanne, Switzerland

† Present address: Department of Chemistry, Durham University, DH1 3LE Durham, United Kingdom

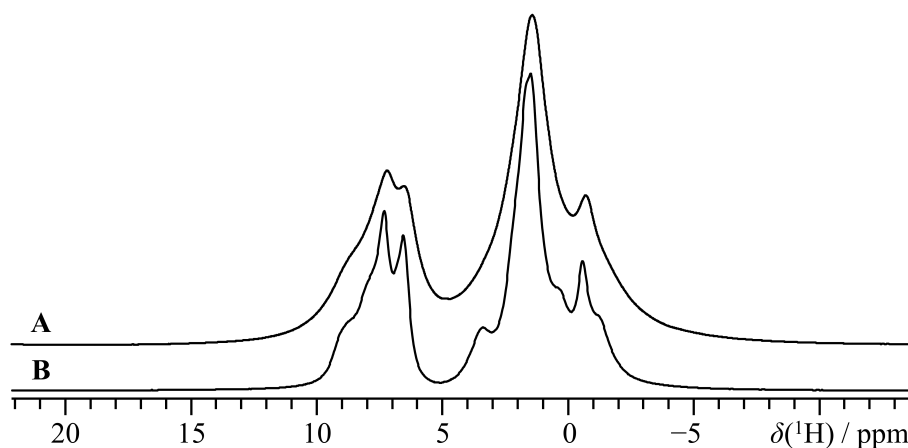

**Figure S1.** Comparison of  $^1\text{H}$  echo MAS NMR spectra of **1**, acquired under different conditions. In (A),  $B_0 = 16.4$  T and  $\nu_{\text{MAS}} = 20.00$  kHz (16 scans with a recycle delay of 11.8 s), while in (B),  $B_0 = 11.75$  T and  $\nu_{\text{MAS}} = 60.94$  kHz (*n.b.*, the spectrum in Figure 2 of the main manuscript).

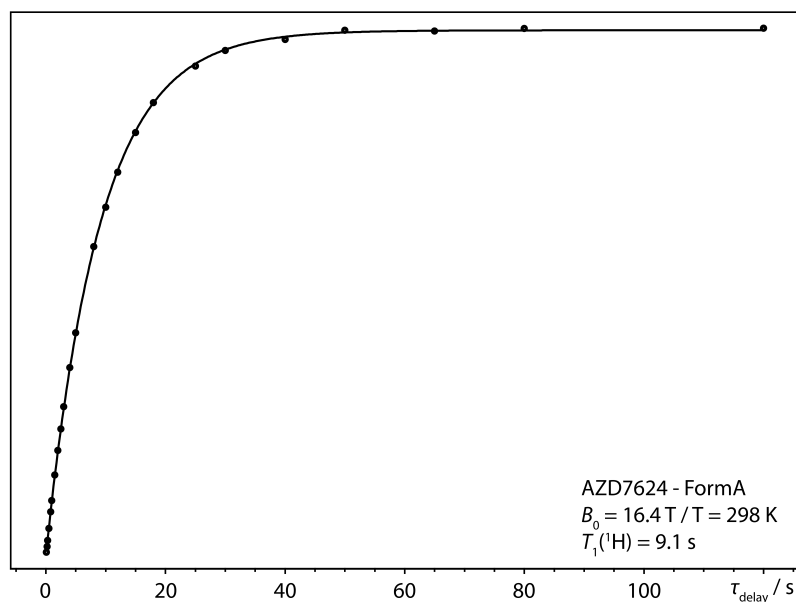

**Figure S2.**  $T_1(^1\text{H})$  build-up curve for **1**, measured at  $B_0 = 16.4$  T,  $T = 298$  K, and  $\nu_{\text{MAS}} = 20.00$  kHz using a saturation recovery pulse sequence with 20 saturating pulses. The time between the saturating pulse loop and the  $\pi/2$  read out pulse is given by the horizontal axis, while the vertical axis is the  $^1\text{H}$  signal intensity, in arbitrary units. For each point, 2 transients were collected and averaged.

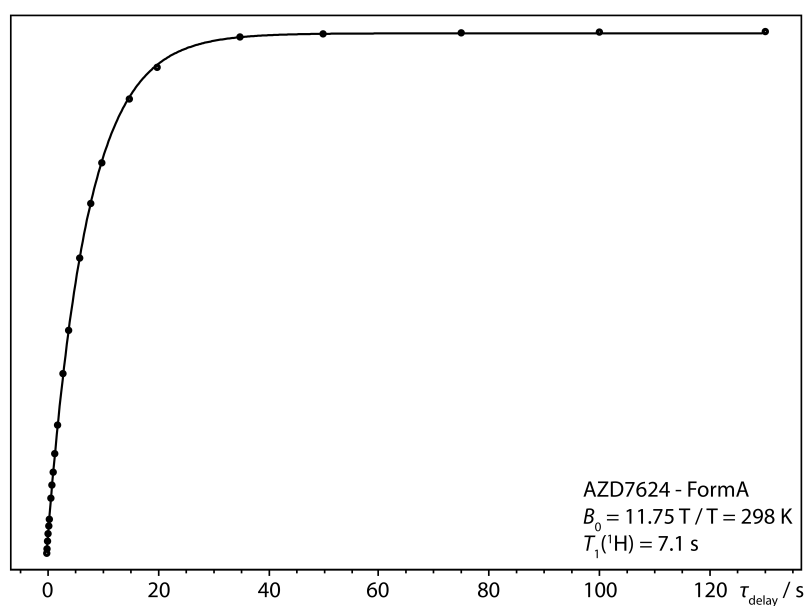

**Figure S3.**  $T_1(^1\text{H})$  build-up curve for **1**, measured at  $B_0 = 11.75 \text{ T}$ ,  $T = 298 \text{ K}$ , and  $\nu_{\text{MAS}} = 12.50 \text{ kHz}$  using a saturation recovery pulse sequence with 20 saturating pulses. For each point, 8 transients were collected and averaged.

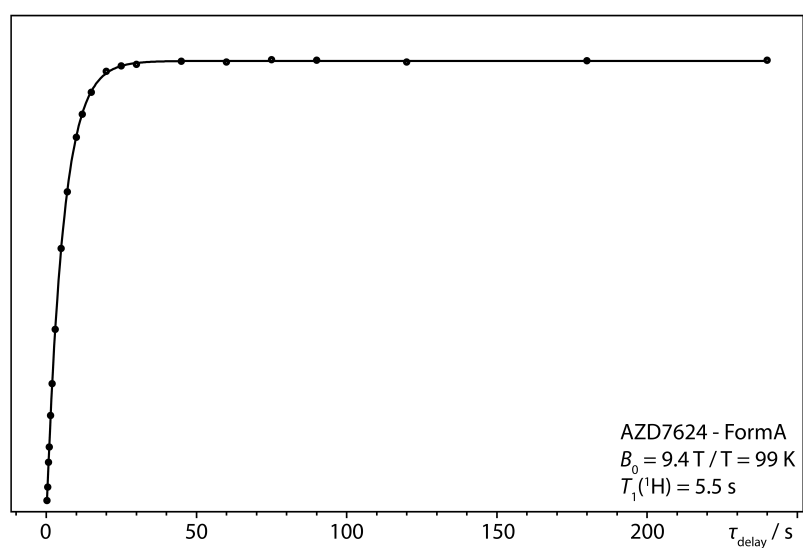

**Figure S4.**  $T_1(^1\text{H})$  build-up curve for **1**, measured at  $B_0 = 9.4 \text{ T}$ ,  $T = 99 \text{ K}$ , and  $\nu_{\text{MAS}} = 10.00 \text{ kHz}$  using a saturation recovery pulse sequence with 20 saturating pulses. For each point, 16 transients were collected and averaged.

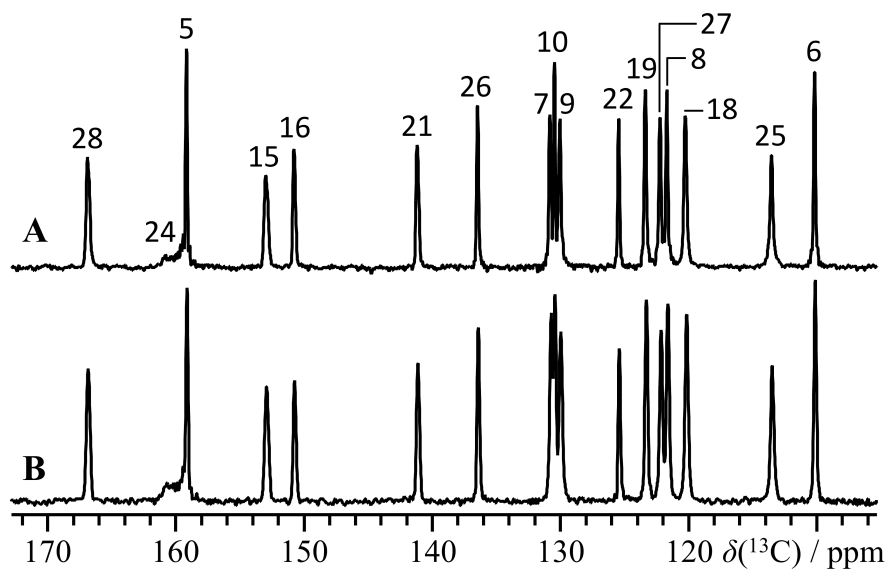

**Figure S5.** High chemical shift regions of  $^{13}\text{C}$  CP/MAS NMR spectra acquired at  $B_0 = 16.4\text{ T}$ ,  $T = 298\text{ K}$ , and with  $\nu_{\text{MAS}} = 12.50\text{ kHz}$  (**A**), and  $16.00\text{ kHz}$  (**B**) for **1**. The recycle delay used was  $11.8\text{ s}$  for both spectra, with 512 and 760 transients collected and averaged for (**A**) and (**B**), respectively.

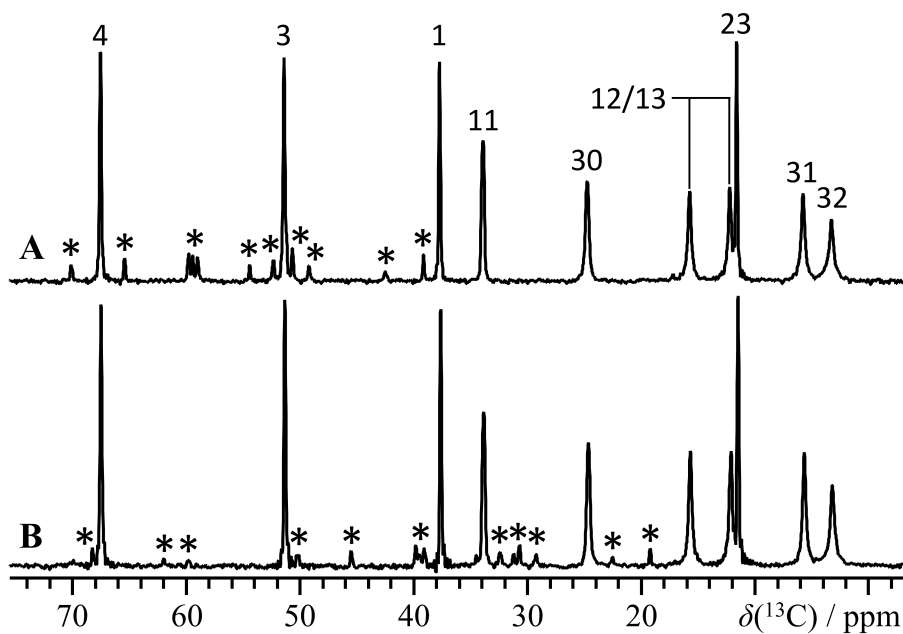

**Figure S6.** Low chemical shift regions of  $^{13}\text{C}$  CP/MAS NMR spectra acquired at  $B_0 = 16.4\text{ T}$ ,  $T = 298\text{ K}$ , and with  $\nu_{\text{MAS}} = 12.50\text{ kHz}$  (**A**), and  $16.00\text{ kHz}$  (**B**) for **1**, as in Figure S5. Asterisks denote spinning sidebands and do not correspond to unique chemical sites.



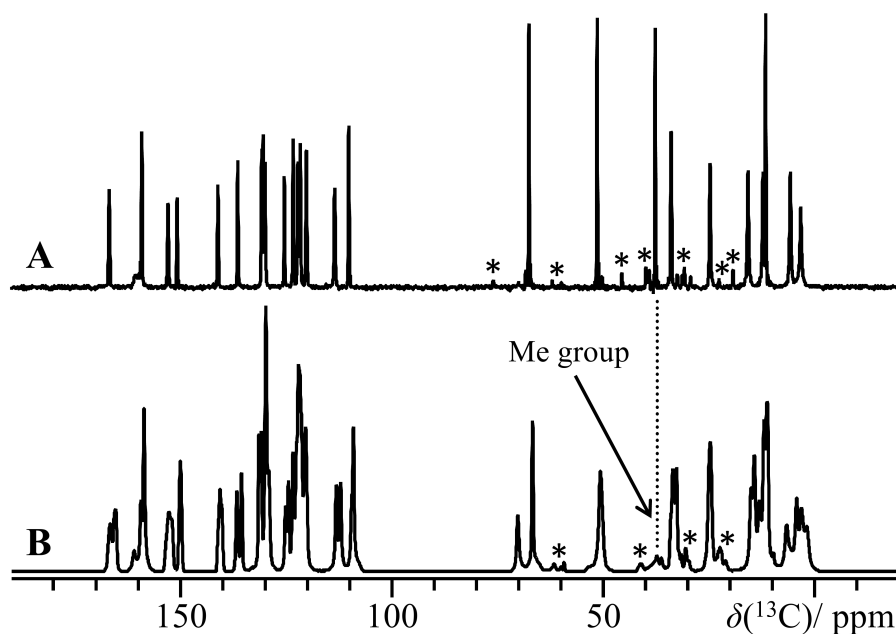

**Figure S7.**  $^{13}\text{C}$  CP/MAS NMR spectra of **1**, acquired at  $B_0 = 16.4$  T,  $\nu_{\text{MAS}} = 16.00$  kHz and  $T = 298$  K (**A**), and at  $B_0 = 9.4$  T,  $\nu_{\text{MAS}} = 10.00$  kHz and  $T = 94$  K (**B**). It is clear that there are a significant number of new peaks (nearly double) present in the lower-temperature spectrum. As eventually concluded in the main text, these observations are consistent with dynamic disorder which occurs at the higher temperature being suppressed at the lower temperature (or occurring on a timescale which is much less than the NMR frequency of the spectrum in (**B**), which is ca. 100 MHz). Asterisks denote spinning sidebands. In (**B**), the recycle delay was 10.0 s, with 4752 transients collected and averaged, while (**A**) is the same spectrum depicted in Figures S5B and S6B. By performing the low-temperature experiment, we also gain clear insight into the identity of the methyl group carbons (as indicated), as this temperature regime is often where methyl group reorientations are transitioning between isotropic and non-isotropic modes.

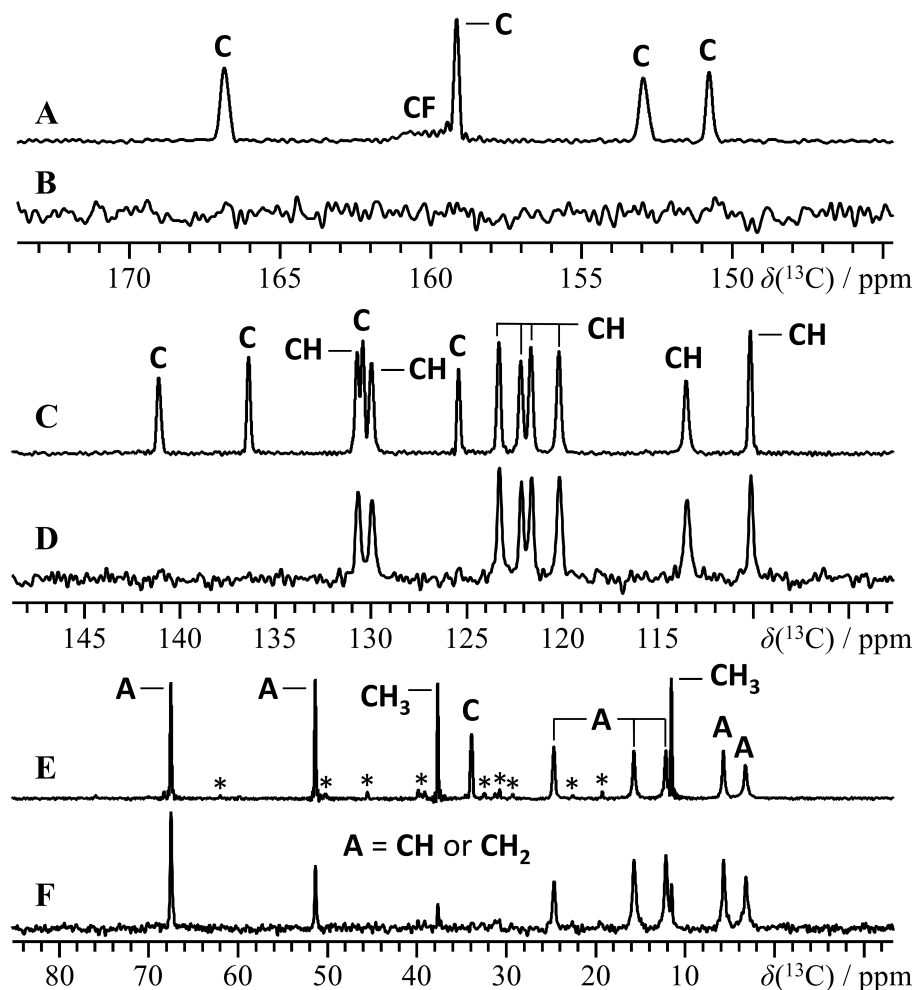

**Figure S8.**  $^{13}\text{C}$  CP/MAS NMR spectra of **1**, acquired at  $B_0 = 16.4$  T with  $\nu_{\text{MAS}} = 16.00$  kHz and  $T = 298$  K. The spectra in (A,C,E) are collected after a typical CP contact period (2 ms), while the spectra in (B,D,F) are collected using a short CP (SCP) pulse sequence (0.5 ms  $^1\text{H}$  spin lock followed by a 40  $\mu\text{s}$  contact time). (A,C,E) resulted from 760 transients, while (B,D,F) resulted from 256 transients. For all, the recycle delay was 11.8 s. Asterisks denote spinning sidebands due to MAS. Unambiguous group assignments based only on SCP NMR data are indicated.

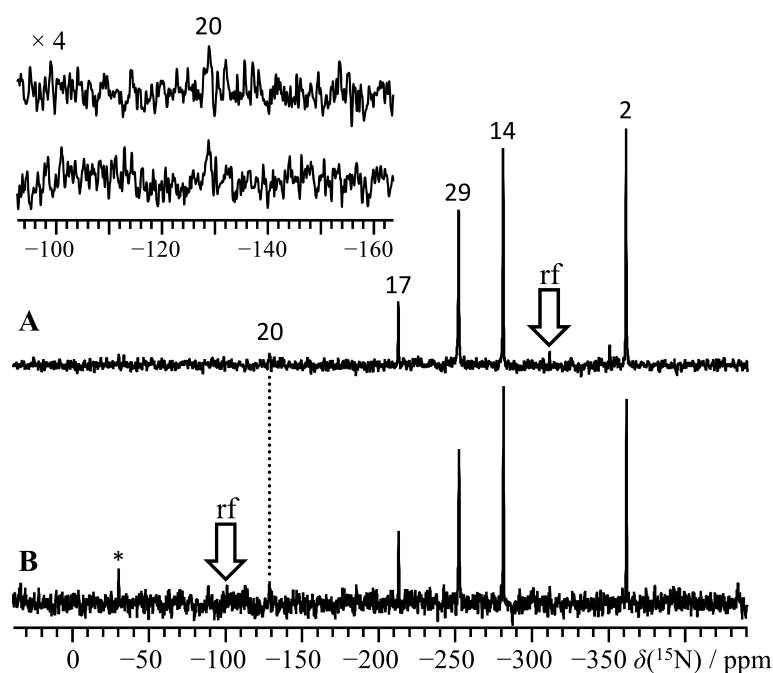

**Figure S9.**  $^{15}\text{N}$  CP/MAS NMR spectra of **1**, acquired at  $B_0 = 16.4$  T with  $\nu_{\text{MAS}} = 7.00$  kHz and  $T = 298$  K. Spectra in (A) and (B) were acquired under very similar experimental conditions, except for a change in the radiofrequency (rf) irradiation position, as indicated in each spectrum using an arrow. This was done to excite a portion of the frequency range that would be difficult to excite otherwise. The weak signal from site 20 is tentatively observed, but to clarify, inset above A is a horizontal and vertical expansion of the respective spectra for the region near the suspected peak. The asterisk denotes a spinning sideband associated with this site. The spectrum in (A) resulted from averaging 5184 transients, while (B) resulted from averaging 1112 transients.

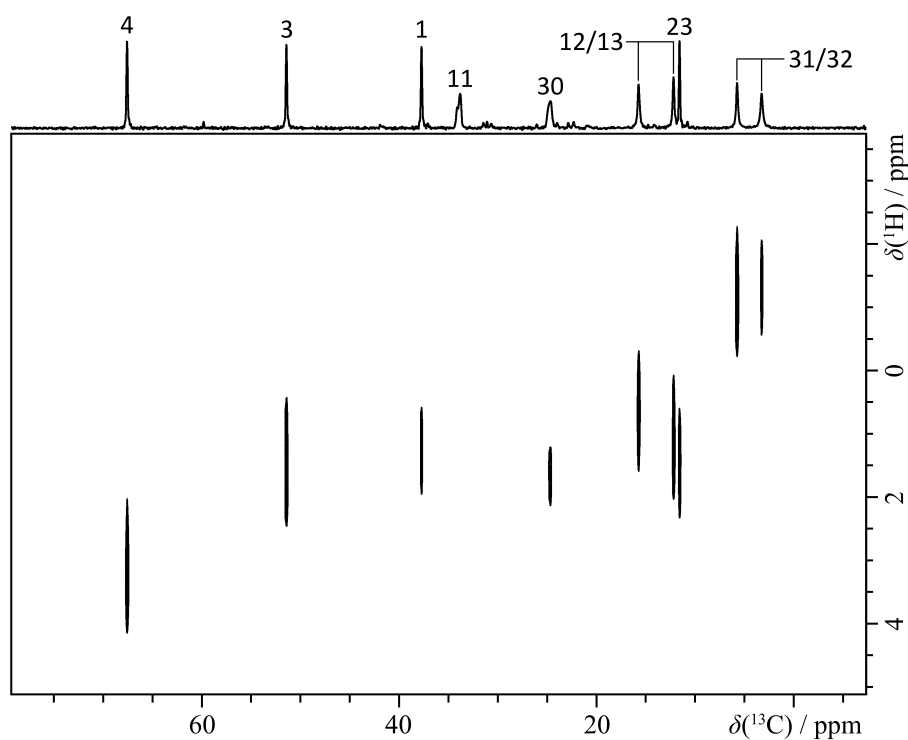

**Figure S10.** Low-frequency region of the  $^1\text{H}$ - $^{13}\text{C}$  HETCOR NMR spectrum acquired of **1** at  $B_0 = 11.75$  T,  $T = 293$  K and  $\nu_{\text{MAS}} = 12.50$  kHz. All else is as in Figure 4a of the main paper.

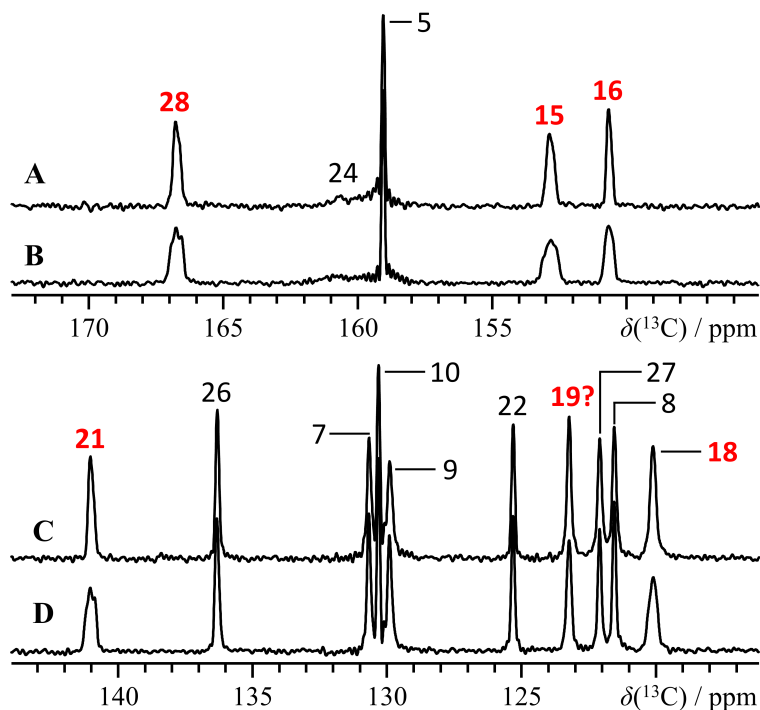

**Figure S11.** Selected spectral regions of the  $^{13}\text{C}$  CP/MAS NMR spectra of **1**, under  $\nu_{\text{MAS}} = 12.50$  kHz at  $B_0 = 16.4$  T (A,C) and at  $B_0 = 11.75$  T (B,D) highlight the residual dipolar coupling between  $^{13}\text{C}$  and  $^{14}\text{N}$  under MAS. Bold red site labels indicate signals which are consistent with coupling to  $^{14}\text{N}$ . One site is suspected of coupling to  $^{14}\text{N}$ , but it is not unambiguous (denoted with '?'). A similar process was applied for the other  $^{13}\text{C}$  resonances (not shown).

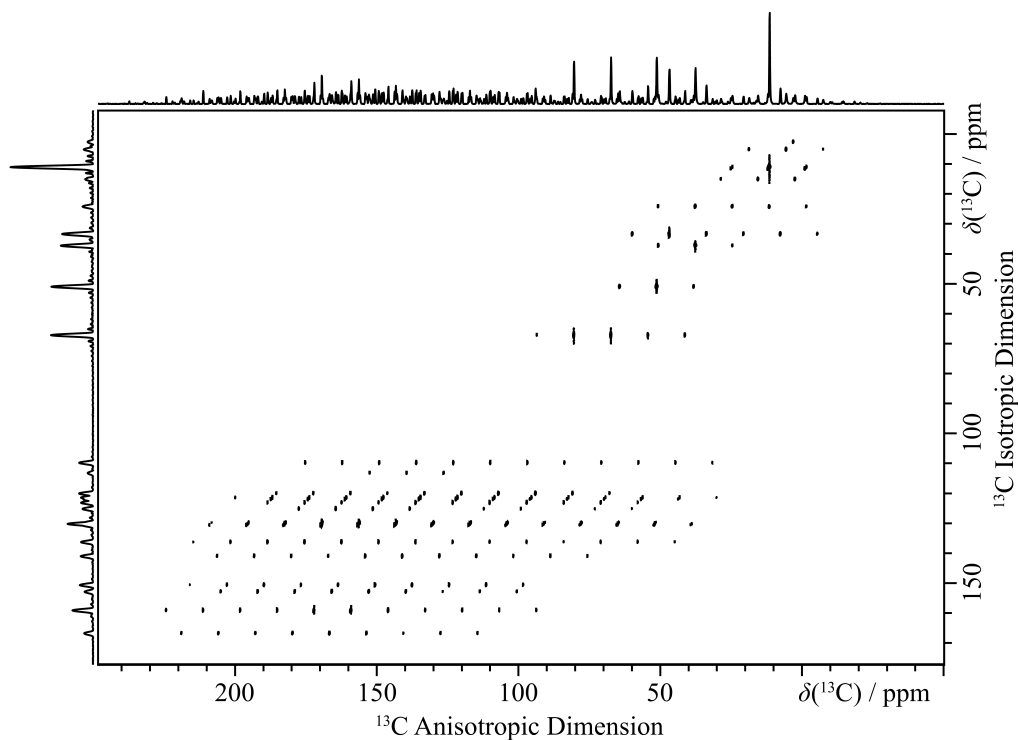

**Figure S12.** Full  $^{13}\text{C}$ - $^{13}\text{C}$   $5\pi$ -PULSE MAT NMR spectrum of **1** acquired at  $B_0 = 16.4$  T,  $\nu_{\text{MAS}} = 2.3$  kHz and  $T = 298$  K. The spectrum was acquired with a recycle delay of 11.8 s, 56 transients per  $t_1$  increment, and 256  $t_1$  increments for a total experiment time of 47 h.

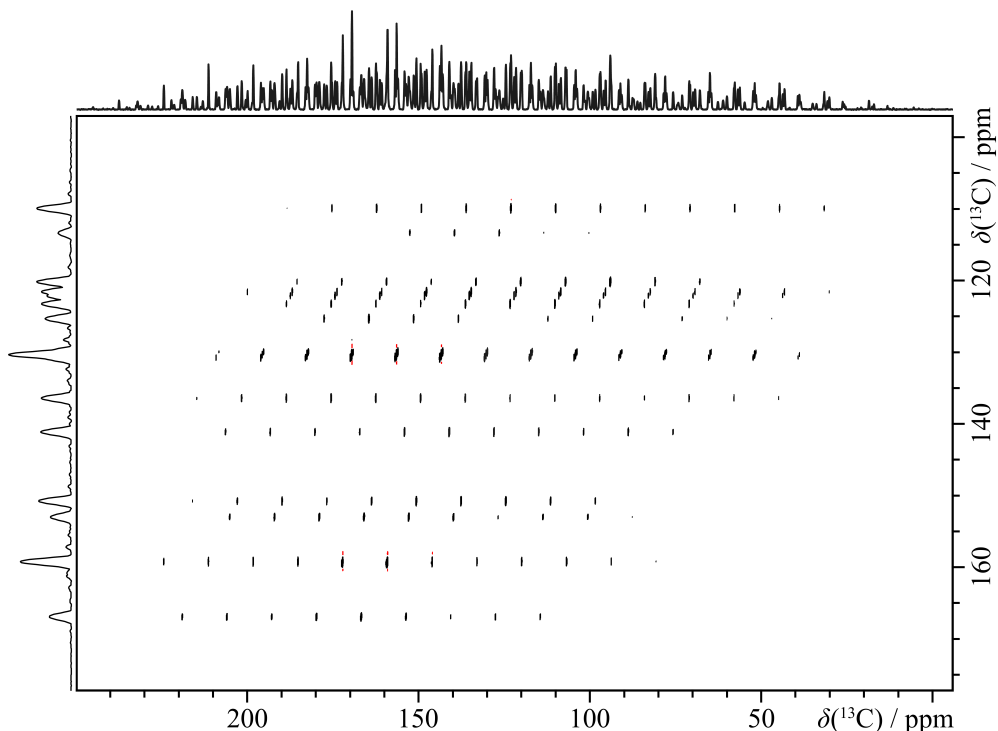

**Figure S13.** Partial  $^{13}\text{C}$ - $^{13}\text{C}$   $5\pi$ -PULSE MAT NMR spectrum of **1** acquired at  $B_0 = 16.4$  T,  $\nu_{\text{MAS}} = 2.3$  kHz and  $T = 298$  K, in order to display more spectral detail. This Figure is simply a portion of what was displayed in Figure S12, and otherwise remains as presented in Figure S12.

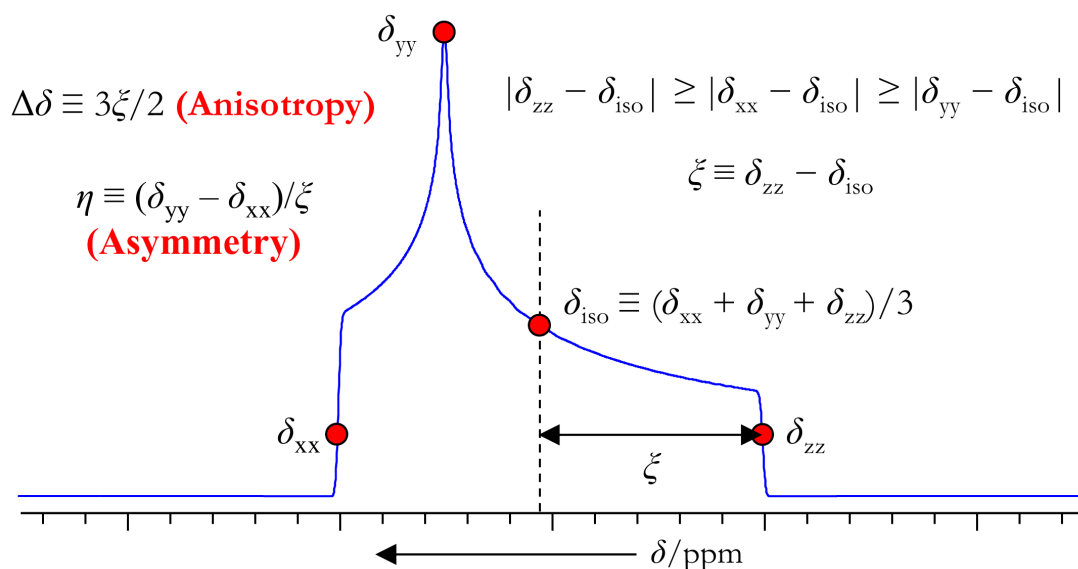

**Figure S14.** Typical response for an isolated spin-1/2 nucleus in a powdered sample under static conditions (blue trace). The shift tensor parameter definitions are according to the convention of Haeberlen, Mehring, and Spiess.<sup>1-3</sup> The characteristic break points denoted correspond intimately to the anisotropy and asymmetry tensor parameters, as specified.

**Table S1.** Measured  $^{13}\text{C}$  shift tensor parameters for **1**<sup>a</sup>

| $^{13}\text{C}$ label | $\delta_{\text{iso}}$ / ppm | $\Delta\delta$ / ppm | $\eta$     |
|-----------------------|-----------------------------|----------------------|------------|
| <b>28</b>             | 166.85                      | -116.6(0.6)          | 0.92(0.01) |
| <b>24</b>             | ca. 160.2                   | n.d.                 | n.d.       |
| <b>5</b>              | 159.13                      | -123.8(1.4)          | 0.88(0.02) |
| <b>15</b>             | 152.93                      | -125.7(0.9)          | 0.76(0.01) |
| <b>16</b>             | 150.74                      | 109.1(0.8)           | 0.75(0.01) |
| <b>21</b>             | 141.12                      | 129.8(1.0)           | 0.91(0.01) |
| <b>26</b>             | 136.41                      | -164.0(0.8)          | 0.53(0.01) |
| <b>7</b>              | 130.74                      | -172.0(1.5)          | 0.70(0.02) |
| <b>10</b>             | 130.41                      | -150.7(0.7)          | 0.35(0.01) |
| <b>9</b>              | 129.98                      | -157.4(1.2)          | 0.78(0.02) |
| <b>22</b>             | 125.39                      | -156.2(1.1)          | 0.29(0.01) |
| <b>19</b>             | 123.30                      | 131.9(1.4)           | 0.83(0.01) |
| <b>27</b>             | 122.15                      | -153.6(0.7)          | 0.64(0.01) |
| <b>8</b>              | 121.62                      | -161.7(1.2)          | 0.77(0.01) |
| <b>18</b>             | 120.17                      | 124.3(0.9)           | 0.53(0.01) |
| <b>25</b>             | 113.46                      | -143.4(1.5)          | 0.47(0.02) |
| <b>6</b>              | 110.10                      | -146.9(0.8)          | 0.70(0.01) |
| <b>4</b>              | 67.52                       | -52.1(0.3)           | < 0.01     |
| <b>3</b>              | 51.35                       | -33.8(0.3)           | 0.46(0.02) |
| <b>1</b>              | 37.65                       | -32.2(0.2)           | < 0.01     |
| <b>11</b>             | 33.84                       | -74.2(0.8)           | 0.15(0.02) |
| <b>30</b>             | 24.65                       | -70.7(0.4)           | 0.78(0.01) |
| <b>12/13</b>          | 15.67                       | 54.6(0.3)            | 0.62(0.01) |
| <b>13/12</b>          | 12.11                       | 50.6(0.6)            | 0.77(0.02) |
| <b>23<sup>b</sup></b> | 11.50                       | 18.8(0.1)            | 0.59(0.01) |
| <b>31/32</b>          | 5.66                        | -44.7(0.4)           | 0.65(0.02) |
| <b>32/31</b>          | 3.18                        | -43.5(0.5)           | 0.65(0.02) |

<sup>a</sup> Values are established using data from the  $5\pi$ -PULSE MAT experiment at  $B_0 = 16.4$  T and  $\nu_{\text{MAS}} = 2.3$  kHz (Figure S12). Errors in the fit are provided in brackets for the anisotropy and asymmetry parameters (isotropic chemical shifts are taken directly from Table 1).

<sup>b</sup> Due to the small tensor anisotropy associated with this site, the shift tensor parameters extracted are not considered accurate.

**Table S2.** DFT-computed SCF energies for CSP-generated structures where  $Z' = 1$ 

| structure #<br>(Fig. 8a) | structure name<br>(CSP internal) | Z | E (eV)        | E' (eV/molec.) <sup>a</sup> | $\Delta E$ (kJ/molec.) <sup>b</sup> |
|--------------------------|----------------------------------|---|---------------|-----------------------------|-------------------------------------|
| 1                        | 1n_01_359_opt                    | 4 | -32132.663841 | -8033.165960                | 9.269574                            |
| 2                        | 2_01_162_opt                     | 2 | -16065.654829 | -8032.827415                | 41.934803                           |
| 3                        | 3_01_102_opt                     | 2 | -16065.328845 | -8032.664423                | 57.661393                           |
| 4                        | 4_01_327_opt                     | 4 | -32130.743922 | -8032.685981                | 55.581322                           |
| 5                        | 5_2_opt                          | 2 | -16065.561602 | -8032.780801                | 46.432415                           |
| 6                        | 5_CSP_opt_07_60_opt              | 4 | -32131.518932 | -8032.879733                | 36.886755                           |
| 7                        | 5_final_opt                      | 4 | -32131.517875 | -8032.879469                | 36.912244                           |
| 8                        | 5n_03_50_opt                     | 4 | -32131.497079 | -8032.874270                | 37.413897                           |
| 9                        | 6_03_194_opt                     | 4 | -32131.011855 | -8032.752964                | 49.118318                           |
| 10                       | 7n_02_92_opt                     | 4 | -32131.333950 | -8032.833487                | 41.348846                           |
| 11                       | 8_01_249_opt                     | 4 | -32131.300708 | -8032.825177                | 42.150704                           |
| 12                       | 9_01_383_opt                     | 8 | -64263.243487 | -8032.905436                | 34.406758                           |

|    |                        |   |               |              |                 |
|----|------------------------|---|---------------|--------------|-----------------|
| 13 | 10_opt_dimer_01_42_opt | 2 | -16065.564316 | -8032.782158 | 46.301465       |
| 14 | 10n_01_65_opt          | 2 | -16065.868005 | -8032.934003 | 31.650456       |
| 15 | 12_01_409_opt          | 4 | -32131.031744 | -8032.757936 | 48.638561       |
| 16 | 13_05_109_opt          | 4 | -32131.132608 | -8032.783152 | 46.205560       |
| 17 | 14_01_160_opt          | 4 | -32131.999936 | -8032.999984 | 25.284106       |
| 18 | 15_01_219_opt          | 4 | -32132.688855 | -8033.172214 | 8.666181        |
| 19 | 16_01_143_opt          | 2 | -16065.957768 | -8032.978884 | 27.319974       |
| 20 | 17_01_57_opt           | 2 | -16066.228230 | -8033.114115 | 14.271972       |
| 21 | 18_01_35_opt           | 2 | -16066.303154 | -8033.151577 | 10.657367       |
| 22 | 18_2_01_211_opt        | 8 | -64263.859937 | -8032.982492 | 26.971842       |
| 23 | 18n_01_327_opt         | 8 | -64263.901600 | -8032.987700 | 26.469347       |
| 24 | 20_01_334_opt          | 4 | -32132.451663 | -8033.112916 | 14.387674       |
| 25 | 21_01_162_opt          | 4 | -32131.115151 | -8032.778788 | 46.626640       |
| 26 | 22_01_124_opt          | 2 | -16066.250622 | -8033.125311 | 13.191701       |
| 27 | 23_01_112_opt          | 4 | -32131.707045 | -8032.926761 | 32.349138       |
| 28 | 24_01_70_opt           | 2 | -16065.495603 | -8032.747802 | 49.616407       |
| 29 | 25_01_130_opt          | 4 | -32131.521382 | -8032.880345 | 36.827659       |
| 30 | 26_01_165_opt          | 8 | -64264.294392 | -8033.036799 | 21.731943       |
| 31 | 27_2_02_281_opt        | 8 | -64261.034547 | -8032.629318 | 61.048478       |
| 32 | 27n_02_489_opt         | 8 | -64261.058895 | -8032.632362 | 60.754832       |
| 33 | 28_01_164_opt          | 4 | -32130.015579 | -8032.503895 | 73.150220       |
| 34 | 29_01_143_opt          | 4 | -32131.919226 | -8032.979807 | 27.230969       |
| 35 | 30n_01_211_opt         | 4 | -32131.433819 | -8032.858455 | 38.939829       |
| 36 | 31_03_535_opt          | 8 | -64262.613536 | -8032.826692 | 42.004510       |
| 37 | 32_01_108_opt          | 8 | -64264.831945 | -8033.103993 | 15.248586       |
| 38 | 33_01_81_opt           | 4 | -32131.443704 | -8032.860926 | 38.701373       |
| 39 | 34_01_55_opt           | 4 | -32131.364340 | -8032.841085 | 40.615778       |
| 40 | 35_01_73_opt           | 2 | -16066.007816 | -8033.003908 | 24.905497       |
| 41 | 36_02_86_opt           | 4 | -32131.854436 | -8032.963609 | 28.793815       |
| 42 | 36_opt_02_258_opt      | 4 | -32131.878250 | -8032.969563 | 28.219378       |
| 43 | 37_3_01_91_opt         | 4 | -32129.970758 | -8032.492689 | 74.231391       |
| 44 | 37_twist_01_388_opt    | 4 | -32130.281644 | -8032.570411 | 66.732281       |
| 45 | 37n_01_348_opt         | 4 | -32131.601030 | -8032.900258 | 34.906401       |
| 46 | 38_01_10_opt           | 4 | -32132.527008 | -8033.131752 | 12.570233       |
| 47 | 39_01_54_opt           | 8 | -64266.096248 | -8033.262031 | <b>0.000000</b> |
| 48 | 40_01_33_opt           | 2 | -16066.431597 | -8033.215798 | 4.460855        |
| 49 | 41_01_73_opt           | 2 | -16066.312235 | -8033.156118 | 10.219270       |
| 50 | 42_01_42_opt           | 2 | -16065.915678 | -8032.957839 | 29.350524       |
| 51 | 43n_01_50_opt          | 2 | -16066.159272 | -8033.079636 | 17.598752       |
| 52 | 44_01_24_opt           | 4 | -32131.855273 | -8032.963818 | 28.773629       |
| 53 | 45_01_71_opt           | 4 | -32131.398501 | -8032.849625 | 39.791763       |
| 54 | 46_01_15_opt           | 2 | -16065.688478 | -8032.844239 | 40.311461       |
| 55 | 47_01_41_opt           | 4 | -32130.091070 | -8032.522768 | 71.329247       |

<sup>a</sup> Value is the reported energy (E) divided by the number of molecules per unit cell (i.e.,  $E' = E/Z$ ).

<sup>b</sup> Energy relative to the lowest structure (determined to be structure '47'/'39\_01\_54\_opt').

**Table S3.** Normal distribution parameters for GIPAW DFT-calculated  $^{13}\text{C}$   $\sigma_{\text{iso}}$  and  $\Delta\sigma$  parameters across the 55 CSP-generated structures ( $Z' = 1$ )<sup>a</sup>

| label    | $\overline{\sigma_{\text{iso}}} / \text{ppm}$ | $\sigma(\sigma_{\text{iso}}) / \text{ppm}$ | $\kappa(\sigma_{\text{iso}}) / \text{ppm}$ | $\overline{\Delta\sigma} / \text{ppm}$ | $\sigma(\Delta\sigma) / \text{ppm}$ | $\kappa(\Delta\sigma) / \text{ppm}$ |
|----------|-----------------------------------------------|--------------------------------------------|--------------------------------------------|----------------------------------------|-------------------------------------|-------------------------------------|
| <b>1</b> | 133.3                                         | 2.6                                        | 0.17                                       | 54.7                                   | 5.2                                 | -0.43                               |
| <b>3</b> | 119.5                                         | 2.4                                        | 0.73                                       | 49.4 <sup>b</sup>                      | 6.9                                 | -0.45                               |
| <b>4</b> | 101.7                                         | 3.5                                        | 0.36                                       | 64.0                                   | 7.6                                 | -0.45                               |
| <b>5</b> | 7.0                                           | 1.6                                        | -1.03                                      | 133.0                                  | 3.7                                 | -0.39                               |
| <b>6</b> | 57.8                                          | 2.4                                        | -1.36                                      | 165.2                                  | 3.7                                 | 1.01                                |
| <b>7</b> | 38.0                                          | 1.7                                        | -0.72                                      | 189.6                                  | 3.4                                 | 0.53                                |
| <b>8</b> | 48.5                                          | 1.8                                        | -0.20                                      | 177.1                                  | 4.9                                 | 0.56                                |

|              |       |     |       |                    |     |       |
|--------------|-------|-----|-------|--------------------|-----|-------|
| <b>9</b>     | 36.6  | 2.1 | 0.31  | 175.8              | 4.6 | 0.65  |
| <b>10</b>    | 37.4  | 1.6 | -0.33 | 161.3              | 2.7 | 1.29  |
| <b>11</b>    | 135.2 | 2.1 | -1.09 | 76.9               | 3.3 | 1.16  |
| <b>12/13</b> | 156.9 | 2.6 | 0.50  | -51.7              | 3.6 | 0.14  |
| <b>13/12</b> | 156.0 | 2.9 | -1.10 | -51.6              | 4.2 | 0.60  |
| <b>15</b>    | 16.6  | 1.3 | -0.55 | 128.8              | 3.6 | -0.33 |
| <b>16</b>    | 20.1  | 1.1 | -0.54 | -114.0             | 6.4 | 0.47  |
| <b>18</b>    | 50.0  | 2.3 | -0.11 | -127.9             | 1.8 | 0.07  |
| <b>19</b>    | 41.3  | 2.1 | 0.08  | 144.9 <sup>b</sup> | 2.3 | 0.05  |
| <b>21</b>    | 24.9  | 1.3 | 0.31  | 133.9 <sup>b</sup> | 3.0 | -0.86 |
| <b>22</b>    | 39.0  | 1.6 | 0.20  | 167.2              | 2.7 | -0.44 |
| <b>23</b>    | 161.8 | 1.9 | -0.47 | 23.4               | 2.5 | -0.63 |
| <b>24</b>    | 0.0   | 1.2 | -0.18 | -111.6             | 2.5 | -0.18 |
| <b>25</b>    | 53.1  | 1.9 | 0.40  | 159.4              | 6.5 | -0.10 |
| <b>26</b>    | 32.9  | 1.9 | -0.40 | 170.7              | 4.0 | 0.50  |
| <b>27</b>    | 45.7  | 2.3 | 0.00  | 165.0              | 6.2 | -0.37 |
| <b>28</b>    | 1.3   | 2.1 | -0.11 | 129.1 <sup>b</sup> | 4.5 | 0.39  |
| <b>30</b>    | 146.8 | 1.5 | -0.65 | 74.6               | 2.9 | -0.88 |
| <b>31/32</b> | 164.6 | 2.3 | 0.10  | 49.1 <sup>b</sup>  | 3.5 | 0.47  |
| <b>32/31</b> | 164.1 | 2.7 | 0.35  | 49.4 <sup>b</sup>  | 3.9 | -0.01 |

<sup>a</sup> Site labels are as in Scheme 1 of the main paper. If desired, to convert the computed isotropic magnetic shielding values ( $\sigma_{\text{iso}}$ ) into isotropic chemical shift values ( $\delta_{\text{iso}}$ ), the following may be used:  $\delta_{\text{iso}} / \text{ppm} = 169.82 - \sigma_{\text{iso}} / \text{ppm}$ . Likewise, to convert computed magnetic shielding tensor anisotropy values ( $\Delta\sigma$ ) into chemical shift tensor anisotropy values ( $\Delta\delta$ ), the following may be used:  $\Delta\delta / \text{ppm} = -\Delta\sigma / \text{ppm}$ .

<sup>b</sup> Both positive and negative anisotropy values were calculated across the ensemble of structures. Thus we report here the average of the magnitudes for this parameter.

**Table S4.** DFT-computed SCF energies for CSP-generated structures where  $Z' = 2$  (rigid)

| structure #<br>(Fig. 8b) | structure name<br>(CSP internal) | Z | E (eV)        | E' (eV/molec.) <sup>a</sup> | $\Delta E$ (kJ/molec.) <sup>b</sup> |
|--------------------------|----------------------------------|---|---------------|-----------------------------|-------------------------------------|
| 1                        | A-structure_01_27                | 8 | -64264.956183 | -8033.119523                | 13.750169                           |
| 2                        | A-structure_01_29                | 8 | -64265.446394 | -8033.180799                | 7.837800                            |
| 3                        | A-structure_01_30                | 8 | -64265.412134 | -8033.176517                | 8.251004                            |
| 4                        | A-structure_01_31                | 8 | -64264.570168 | -8033.071271                | 18.405850                           |
| 5                        | A-structure_01_32                | 8 | -64264.402954 | -8033.050369                | 20.422594                           |
| 6                        | A-structure_01_33                | 8 | -64264.516530 | -8033.064566                | 19.052770                           |
| 7                        | A-structure_01_34 <sup>c</sup>   | 8 | -32132.112551 | -8033.028138                | 22.567631                           |
| 8                        | A-structure_02_11                | 8 | -64264.933141 | -8033.116643                | 14.028073                           |
| 9                        | B-structure_01_38                | 8 | -64264.122607 | -8033.015326                | 23.803813                           |
| 10                       | B-structure_01_39                | 8 | -64263.845888 | -8032.980736                | 27.141283                           |
| 11                       | B-structure_01_40                | 8 | -64264.854116 | -8033.106765                | 14.981185                           |
| 12                       | B-structure_01_41                | 8 | -64264.830022 | -8033.103753                | 15.271780                           |
| 13                       | B-structure_01_42                | 8 | -64264.860993 | -8033.107624                | 14.898245                           |
| 14                       | B-structure_02_32                | 8 | -64263.625311 | -8032.953164                | 29.801632                           |
| 15                       | B-structure_02_34                | 8 | -64263.435518 | -8032.929440                | 32.090700                           |
| 16                       | B-structure_02_35 <sup>c</sup>   | 8 | -32131.821859 | -8032.955465                | 29.579626                           |
| 17                       | B-structure_03_10 <sup>c</sup>   | 8 | -32131.792862 | -8032.948215                | 30.279097                           |
| 18                       | B-structure_03_12 <sup>c</sup>   | 8 | -32131.821859 | -8032.955465                | 29.579626                           |
| 19                       | B-structure_03_13                | 8 | -64264.086337 | -8033.010792                | 24.241266                           |
| 20                       | B-structure_03_14                | 8 | -64263.806856 | -8032.975857                | 27.612047                           |
| 21                       | B-structure_03_15                | 8 | -64264.847323 | -8033.105915                | 15.063123                           |
| 22                       | B-structure_03_16                | 8 | -64263.417615 | -8032.927202                | 32.306632                           |
| 23                       | B-structure_03_19                | 8 | -64263.426907 | -8032.928363                | 32.194565                           |
| 24                       | B-structure_03_22                | 8 | -64264.063187 | -8033.007898                | 24.520474                           |
| 25                       | B-structure_03_25 <sup>c</sup>   | 8 | -32132.015416 | -8033.003854                | 24.910696                           |



<sup>a</sup> Reported energy (E) divided by the number of molecules per unit cell (i.e.,  $E' = E/Z$ ).

<sup>b</sup> Energy relative to the lowest structure (i.e., '47'/'39\_01\_54\_opt' from the  $Z' = 1$  CSP set).

<sup>c</sup> Unit cell symmetry was such that four molecules were required for the computation, rather than the full  $Z = 8$ .

**Table S5.** DFT-computed SCF energies for CSP-generated structures where  $Z' = 2$  (flexible)

| structure #<br>(Fig. 8b) | structure name<br>(CSP internal) | Z | E (eV)        | E' (eV/molec.) <sup>a</sup> | $\Delta E$ (kJ/molec.) <sup>b</sup> |
|--------------------------|----------------------------------|---|---------------|-----------------------------|-------------------------------------|
| 26                       | structure_01_14-castopt          | 8 | -64264.178213 | -8033.022277                | 23.133158                           |
| 27                       | structure_01_18-castopt          | 8 | -64264.263632 | -8033.032954                | 22.102929                           |
| 28                       | structure_01_20-castopt          | 8 | -64264.194580 | -8033.024322                | 22.935766                           |
| 29                       | structure_01_21-castopt          | 8 | -64264.676983 | -8033.084623                | 17.117568                           |
| 30                       | structure_01_22-castopt          | 8 | -64263.640621 | -8032.955078                | 29.616990                           |
| 31                       | structure_01_25-castopt          | 8 | -64264.157010 | -8033.019626                | 23.388885                           |
| 32                       | structure_01_30-castopt          | 8 | -64263.690149 | -8032.961269                | 29.019637                           |
| 33                       | structure_05_40-castopt          | 8 | -64264.209363 | -8033.026170                | 22.757469                           |
| 34                       | structure_05_50-castopt          | 8 | -64263.768439 | -8032.971055                | 28.075384                           |
| 35                       | structure_05_54-castopt          | 8 | -64263.729460 | -8032.966182                | 28.545513                           |

<sup>a</sup> Reported energy (E) divided by the number of molecules per unit cell (i.e.,  $E' = E/Z$ ).

<sup>b</sup> Energy relative to the lowest structure, as before.

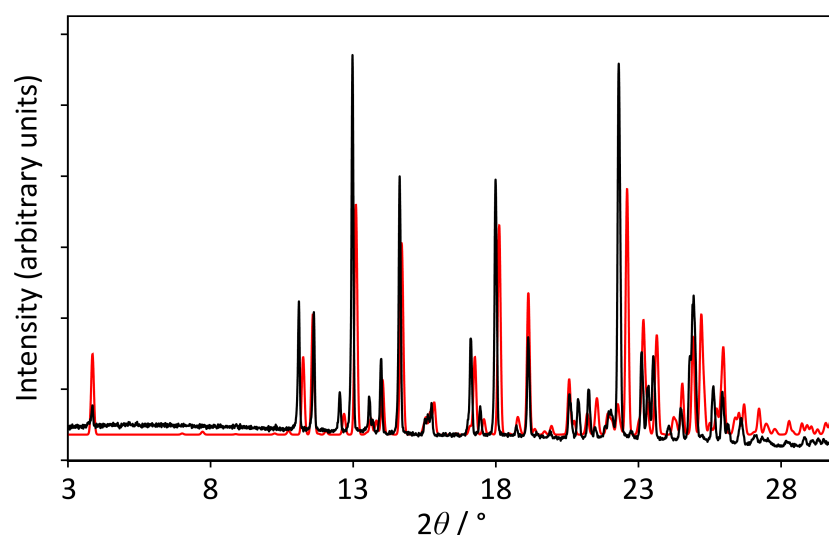

**Figure S15.** Simulated powder diffraction pattern (using the scXRD structure of **1** at 100 K) in red, and the experimental pXRD data acquired at room temperature, in black. The agreement is generally fairly good, yet clearly not optimal.

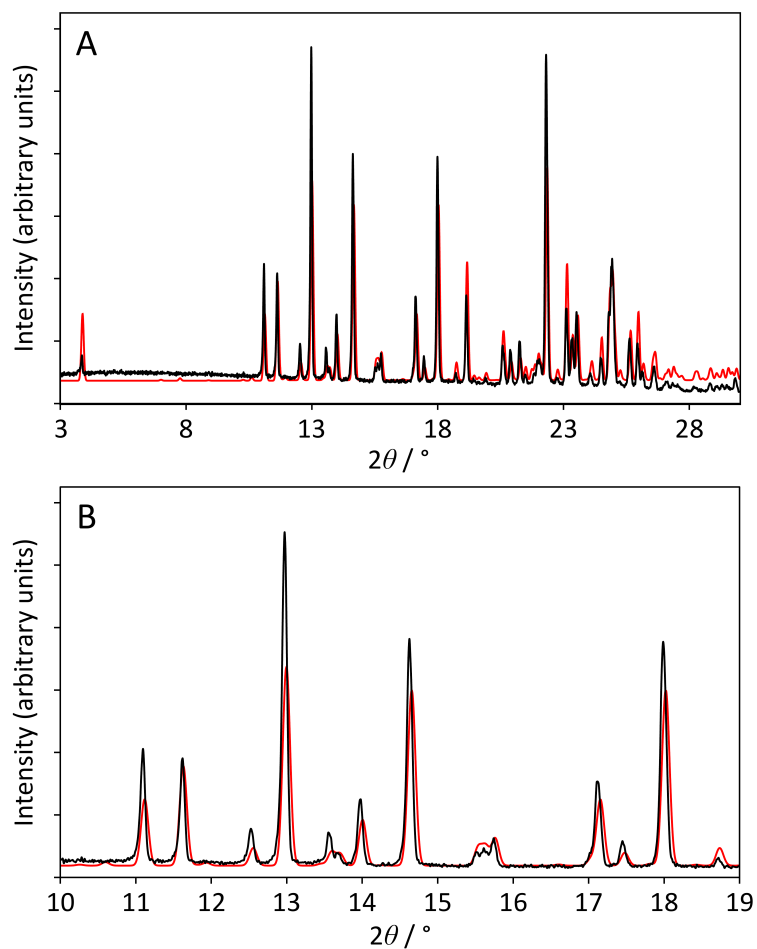

**Figure S16.** Comparison of simulated and experimental powder XRD patterns after adjusting the unit cell of the scXRD crystal structure determined at 100 K (original fractional atomic positions are retained from the diffraction structure of **1** at 100 K) such that it matched the unit cell measured for **1** at room temperature. In (A) very good agreement is seen over a range of reflections, while (B) shows the  $2\theta = 10 - 19^\circ$  region only.

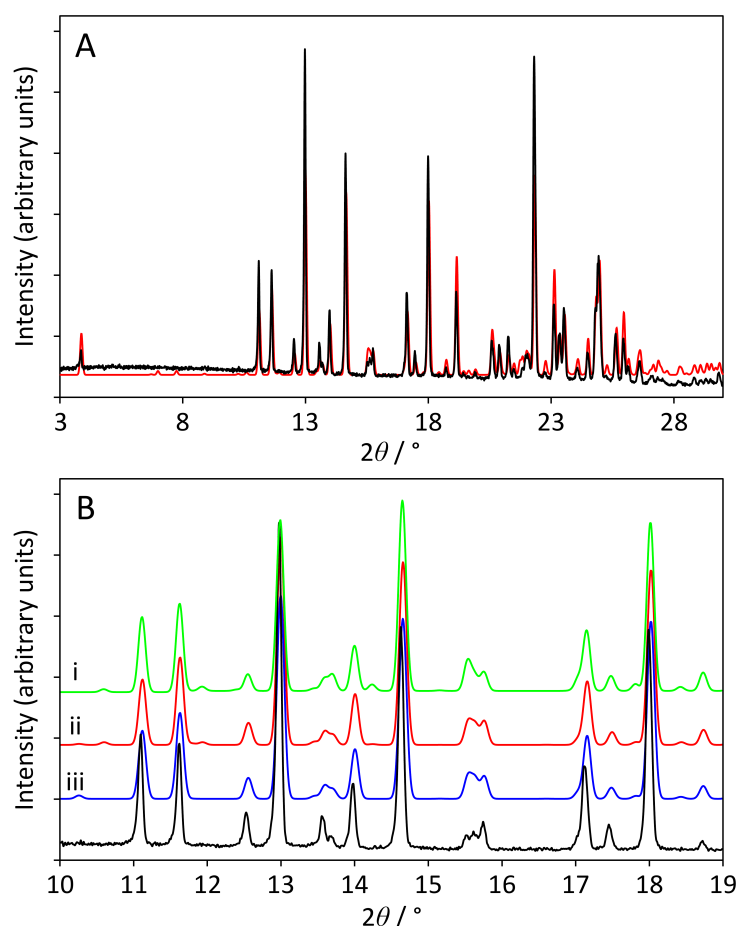

**Figure S17.** Comparison of the experimental powder XRD pattern, and those simulated after adjusting the unit cells of CSP-generated structures from the  $Z' = 2$  set (original fractional atomic positions are retained for all CSP structures) such that they closely agreed with the unit cell measured for **1** at room temperature. In (A) very good agreement is seen over a range of reflections for CSP structure 2, while (B) shows the  $2\theta = 10 - 19^\circ$  region for CSP structures 1 (i), 2 (ii), and 3 (iii).

**Table S6.** Direct space heavy atom RMSD values for leading CSP structures ( $Z' = 2$ , rigid)<sup>a</sup>

| structure #<br>(Fig. 8b) | space group  | RMSD <sub>1</sub> / Å <sup>b</sup> | RMSD <sub>2</sub> / Å | RMSD <sub>4</sub> / Å | RMSD <sub>8</sub> / Å | RMSD <sub>16</sub> / Å |
|--------------------------|--------------|------------------------------------|-----------------------|-----------------------|-----------------------|------------------------|
| 1                        | $P2_12_12_1$ | 0.044                              | 0.056                 | 0.116                 | 0.256                 | — <sup>c</sup>         |
| 2                        | $P2_1/c$     | 0.044                              | 0.056                 | 0.111                 | 0.166                 | 0.166                  |
| 3                        | $Pca2_1$     | 0.044                              | 0.056                 | 0.106                 | 0.165                 | 0.208                  |

<sup>a</sup> Leading structures after considering all pXRD and SSNMR data.

<sup>b</sup> Subscript corresponds to the number of AZD7624 molecules which were attempted to be overlaid.

<sup>c</sup> Could not overlay all 16 molecules (15 out of 16 in this case).

## References

1. U. Haeblerlen, *Advances in Magnetic Resonance*, Academic Press, New York, 1976.
2. M. Mehring, *Principles of High Resolution NMR in Solids*, Springer-Verlag, Berlin, 2 edn., 1983.
3. H. W. Spiess, *NMR Basic Principles and Progress*, Springer-Verlag, Berlin, 1978.
